# Supplementary material for: Attribution Markers and Data Mining in Art Authentication
Source: MDPI journal article supplement (doi:10.3390/molecules27010070), 2021-12-23
Supplement: s1 [file s1]

**Table S1.** The list of the analysed paintings

| Lp. | Paintings                                                                                                                                                                                                                       |
|-----|---------------------------------------------------------------------------------------------------------------------------------------------------------------------------------------------------------------------------------|
| 1   | Willem & Joan Blaeu, <i>Theatrum orbis terrarum sive Atlas Novus</i> , Amsterdam 1649–1655, Ossoliński National Institute *                                                                                                     |
| 2   | J.J.Knechtel „ <i>Święty Augustyn</i> ” (Jawor) ca.1730*                                                                                                                                                                        |
| 3   | J.J Knechtel „ <i>Bolko II Swidnicki</i> ” ca. 1720*                                                                                                                                                                            |
| 4   | M.L.Wilmann „ <i>Chrystus przy kolumnie</i> ” ca. 1701, National Museum in Wrocław*                                                                                                                                             |
| 5   | A. Grottger „ <i>Ekwipaż</i> ” ca. 1849, National Museum in Wrocław, Ossoliński National Institute*                                                                                                                             |
| 6   | Johann Baptist Homann, „ <i>Imperium Romano-Germanicum Germanicum in suos Circulos divisum Geographice exhibitum et in Usum Scholarum designatum [...]</i> ”, Norymberga 1732*                                                  |
| 7   | A.Grottger „ <i>Gra w Marasza</i> ” ca. 1858-1960 , Ossoliński National Institute*                                                                                                                                              |
| 8   | Sofonisba Anguissola „ <i>Gra w szachy</i> ” MNP*                                                                                                                                                                               |
| 9   | H. Siemiradzki „ <i>Idylla</i> ” private collection**                                                                                                                                                                           |
| 10  | Johann Baptist Homann, „ <i>Statuum totius Italiae novissima repraesentatio geographica simul exhibens Insulas Siciliae Corsicae et Maltae connate</i> , Norymberga 1729*                                                       |
| 11  | M.L. Willmann „ <i>Św. Jan Kapistran</i> ”, ca. 1693*                                                                                                                                                                           |
| 12  | J.J. Knechtel „ <i>Karol Boromeusz</i> ” Przychowa ca. 1721*                                                                                                                                                                    |
| 13  | A.Grottger „ <i>Krajobraz górski</i> ” ca. 1855 , Ossoliński National Institute*                                                                                                                                                |
| 14  | M.L. Willmann „ <i>Męczeństwo św Barbary</i> ” ca. 1680-85, National Museum in Wrocław*                                                                                                                                         |
| 15  | M.L. Willmann „ <i>Koronacja Najświętszej Marii Panny</i> ” 1685, National Museum in Wrocław*                                                                                                                                   |
| 16  | J.J Knechtel „ <i>Święty Jan Niepomucen</i> ” Lubomierz ca.1736*                                                                                                                                                                |
| 17  | J.J. Knechtel „ <i>Święty Jan Niepomucen</i> ” Przychowa ca. 1721*                                                                                                                                                              |
| 18  | M.L. Willmann „ <i>Orfeusz grający zwierzętom</i> ” 1670, National Museum in Wrocław*                                                                                                                                           |
| 19  | G. Penni „ <i>The Holy Family with Saint John and Saint Catherine</i> ” Childs Gallery in Boston ( <i>access to the data from Harvard Institute</i> )                                                                           |
| 20  | G. Penni „ <i>The Holy Family with Saint John and Saint Catherine</i> ” National Museum in Warsaw*                                                                                                                              |
| 21  | A. Grotter „ <i>Po powstaniu</i> ” 1864, National Museum in Wrocław*                                                                                                                                                            |
| 22  | A. Grotter „ <i>Portret Jerzego Lubomirskiego</i> ” 1866, National Museum in Wrocław*                                                                                                                                           |
| 23  | M.L. Willman „ <i>Porwanie Persefony</i> ” ca 1665 National Museum in Wrocław*                                                                                                                                                  |
| 24  | Vincenzo Maria Coronelli, „ <i>Silesia Inferiore</i> ”, Dedicata Dal P. Cosmografo Coronelli All Illustrissimo et Eccellentissimo S. Gio. Battista Gradenigo, Senatore Amplissimo, Wenecja 1692, Ossoliński National Institute* |
| 25  | Abraham Ortelius, „ <i>Silesiae typus</i> ”, A Martino Helwigio Nissense descriptus et Nobili docto-que viro Domino Nicolao Rhedingero ded., Antwerp 1603, Ossoliński National Institute*                                       |
| 26  | M.L. Willmann „ <i>Święta Rodzina</i> ” 1678, National Museum in Wrocław *                                                                                                                                                      |
| 27  | A. Grotter „ <i>Szarża ułanów</i> ” 1855 , Ossoliński National Institute*                                                                                                                                                       |
| 28  | A. Grotter „ <i>Szpica polska</i> ” ca. 1855, Ossoliński National Institute*                                                                                                                                                    |
| 29  | J. Tintoretto (1518-1594) „ <i>Narcyż</i> ” private collection*                                                                                                                                                                 |
| 30  | A. Grotter „ <i>Towarzystwo w parku</i> ” 1864 r, Ossoliński National Institute*                                                                                                                                                |
| 31  | J.J. Knechtel „ <i>Ukrzyżowanie</i> ” Nowe Miasteczko 1740~1750*                                                                                                                                                                |
| 32  | J.J. Knechtel „ <i>Ukrzyżowanie</i> ” Nysa ca.1750*                                                                                                                                                                             |
| 33  | M.L.Willmann „ <i>Wizja Świętego Antoniego Padewskiego</i> ” 1699*                                                                                                                                                              |
| 34  | Wyspiański „ <i>Szkic do Apolla</i> ” initially attributed to S. Wyspiański**                                                                                                                                                   |
| 35  | Drawings of the painting „ <i>Chrystus wśród dzieci</i> ” initially attributed to W. Wojtkiewicz**                                                                                                                              |
| 36  | M. Gieryski (1846-1874) <i>Pastel with fruits</i> **                                                                                                                                                                            |
| 37  | „ <i>Wiosna w małym miasteczku</i> ” initially attributed to M.Gieryski**                                                                                                                                                       |
| 38  | Norblin „ <i>Scena batalistyczna</i> ” initially attributed to Norblin**                                                                                                                                                        |
| 39  | „ <i>Portret Kobiety</i> ” initially attributed to Olga Boznańska**                                                                                                                                                             |
| 40  | Pastel depicting the landscape, initially attributed to S. Wyspiański**                                                                                                                                                         |
| 41  | „ <i>Uczniowie z Emaus</i> ” Han van Megeren,data from literature [6]                                                                                                                                                           |
| 42  | „ <i>Madonna</i> ” initially attributed to Botticelli**                                                                                                                                                                         |
| 43  | „ <i>Madona z dzieckiem</i> ” initially attributed to Camino**                                                                                                                                                                  |
| 44  | El Greco „ <i>Ekstaza świętego Franciszka</i> ” ca 1575 – 1580, The diocese museum in Siedlce * & **                                                                                                                            |
| 45  | M. Gieryski , Unknown painting, private collection**                                                                                                                                                                            |
| 46  | H. Siemiradzki, Unknown painting, private collection**                                                                                                                                                                          |
| 47  | M. Gieryski „ <i>Jabłoń nad potokiem</i> ” ca. 1867, National Museum in Kraków**                                                                                                                                                |
| 48  | H. Siemiradzki „ <i>Pochodnie Nerona</i> ” 1876, National Museum in Kraków*                                                                                                                                                     |
| 49  | M. Gieryski „ <i>Polowanie par force na jelenia</i> ” 1874, National Museum in Kraków**                                                                                                                                         |
| 50  | H. Siemiradzki „ <i>Scena męczeństwa pierwszych chrześcijan</i> ”, National Museum in Kraków**                                                                                                                                  |
| 51  | M. Gieryski „ <i>Zwady kozaków kubańskich</i> ” 1868-1869, National Museum in Kraków**                                                                                                                                          |
| 52  | „ <i>Sąd Ostateczny</i> ” painting attributed to H. Bosch, The Royal Castel Wawel in Kraków*&**                                                                                                                                 |
| 53  | J.J. Knechtel „ <i>Madonna z dzieckiem</i> ” ca 1739*                                                                                                                                                                           |
| 54  | „ <i>Chrystus w Ogrójcu</i> ” initially attributed to M.L. Willman*                                                                                                                                                             |
| 55  | „ <i>Madonna z dzieckiem i aniołem</i> ” initially attributed to F. Francia**                                                                                                                                                   |

\*The studies were conducted by the Cultural Heritage Research Laboratory at the University of Wrocław (Poland)

\*\* The studies were conducted by the Laboratory of Analysis and Non-Destructive Investigation of Heritage Objects (LANBOZ) in Krakow (Poland)
